# Supplementary material
Source: publisher site journal article supplement (https://www.dovepress.com/article/417865)
Supplement: Supplementary file 1 [file get_supplementary_file.php]

**Supplemental Table 1: Mean absolute error and median absolute errors for short, medium, and long eyes**

|  | **Mean Absolute Error ± SD** | | | **Median Absolute Error** | | |
| --- | --- | --- | --- | --- | --- | --- |
| **Formula** | **Short (D)**  **(n=4)** | **Medium (D)**  **(n=73)** | **Long (D)**  **(n=26)** | **Short (D)**  **(n=4)** | **Medium (D)**  **(n=73)** | **Long (D)**  **(n=26)** |
| Kane | 0.163 ± 0.144 | 0.236 ± 0.261 | 0.257 ± 0.306 | 0.174 | 0.141 | 0.164 |
| EVO | 0.325 ± 0.075 | 0.261 ± 0.253 | 0.270 ± 0.309 | 0.311 | 0.196 | 0.206 |
| BUII | 0.298 ± 0.168 | 0.265 ± 0.284 | 0.297 ± 0.324 | 0.351 | 0.154 | 0.196 |
| HRBF | 0.431 ± 0.266 | 0.283 ± 0.281 | 0.311 ± 0.325 | 0.435 | 0.207 | 0.215 |
| LSF | 0.336 ± 0.205 | 0.296 ± 0.275 | 0.329 ± 0.305 | 0.412 | 0.202 | 0.262 |

**Abbreviations***:* AME, arithmetic mean error; MAE, mean absolute error; MedAE, median absolute error; EVO, Emmetropia Verifying Optical Formula; BUII, Barrett Universal II Formula; HRBF, Hill-Radial Basis Function Formula; LSF, Ladas Super Formula
